# Supplementary material for: Deep Sequencing Transcriptome Analysis of Murine Wound Healing: Effects of a Multicomponent, Multitarget Natural Product Therapy-Tr14
Source: Front Mol Biosci. 2017 Aug 17;4:57. doi: 10.3389/fmolb.2017.00057 (PMC5572416; doi:10.3389/fmolb.2017.00057)
Supplement: Supplementary Table 5 — Raw data for RNA sequencing analysis of mouse wound repair. The raw RPKM data for gene expression for all groups, animals, and time points is reported in the following tables. (A) Reports the (U) group of placebo treated animals, (B) reports the (S) saline injected control group, (C) reports the (I) Traumeel injection group, and (D) reports the (IO) Traumeel injection plus the Traumeel ointment group. (E) Reports a summary of the sequencing data with respect to total raw reads, filtered reads, Informative Reads and the number of expressed transcripts for each sample in the study, by group. [file Table5.XLSX]

## Sheet: Informative reads
*Informative reads are reads aligned with parameters:
minLength = 25
minScore = 4.3
bestOnly = True
globalAmbig = none
Chr1-19,X,Y,M
(G)Gel+Traumeel timecourse
Sample	Raw reads	Filtered reads	Informative reads*	%Filtered	%Informative	Expressed transcripts (out of 55419)
120HG1	37998533	17113938	6186480	0.450384	0.361488	42992
120HG2	47717843	19689784	7853899	0.412629	0.398882	43066
120HG3	43347797	17795070	6872640	0.410518	0.38621	42833
120HG4	39789922	13464533	4909959	0.338391	0.364659	42013
120HG5	58631218	27002318	10457007	0.460545	0.387263	44001
120HG6	46029346	16858750	5803083	0.366261	0.344218	42592
120HG7	16144707	3121735	572334	0.19336	0.183338	33681
12HG1	51129850	28896134	12306331	0.565152	0.425882	43306
12HG2	52436298	29507399	11056101	0.562728	0.374689	42978
12HG3	51059184	28312322	10245481	0.5545	0.361874	42766
12HG4	47598893	25382085	8791656	0.533249	0.346372	41741
12HG5	54243393	31328832	11843970	0.57756	0.378053	43236
12HG6	51701419	28718592	11077654	0.55547	0.385731	42857
192HG1	54824606	21493080	7698988	0.392033	0.358208	43654
192HG2	30456228	9128897	3337998	0.299738	0.365652	41114
192HG3	45000470	17232995	5213730	0.382951	0.302543	42793
192HG4	26727473	6522781	2061258	0.244048	0.316009	39076
192HG5	51840549	21127347	6495844	0.407545	0.307461	43673
192HG6	39520603	15194113	3909225	0.384461	0.257286	41948
192HG7	51218214	21825556	6379956	0.426129	0.292316	43381
24HG1	54086283	28959420	9760541	0.53543	0.337042	43235
24HG2	55173650	29861146	10781799	0.541221	0.361064	43391
24HG3	54303990	29019739	9212809	0.534394	0.317467	42983
24HG4	55333720	30500490	10330201	0.55121	0.33869	43248
24HG5	45612997	25338007	9320488	0.5555	0.367846	42974
24HG6	27293274	17317203	4516980	0.634486	0.260838	40708
36HG1	33299341	16065143	5296392	0.482446	0.329682	40900
36HG2	37375755	20382762	6945082	0.545347	0.340733	41569
36HG3	42268598	23236767	8271435	0.549741	0.355963	42074
36HG4	42949583	23529264	9086840	0.547835	0.386193	41860
36HG5	44531690	24129484	8866812	0.54185	0.367468	42407
36HG6	41896024	22272847	7621236	0.531622	0.342176	41969
72HG1	28043447	11517878	1502376	0.410715	0.130439	37925
72HG2	36157649	16428871	2384218	0.454368	0.145124	39650
72HG3	26425632	9352254	927587	0.353908	0.0991833	34855
72HG4	42723045	20244457	3301330	0.473853	0.163073	40509
72HG5	29475994	11590895	3734725	0.393232	0.322212	40507
72HG6	39361031	18377480	5156265	0.466895	0.280575	41997
96HG1	40503365	22540925	6904463	0.55652	0.306308	42253
96HG2	37967642	19718028	4855311	0.519338	0.246237	41708
96HG3	36929797	21173847	7766160	0.573354	0.366781	42567
96HG4	48498084	27513891	9653763	0.567319	0.350869	43324
96HG5	48127431	22425632	5778400	0.465964	0.257669	42227
96HG6	44863057	25220539	7544912	0.562167	0.299157	42870
average	4.29686e+07	2.0828e+07	6.87713e+06	0.474236	0.317521	41850.2
(S)Saline timecourse
Sample	Raw reads	Filtered reads	Informative reads*	%Filtered	%Informative	Expressed transcripts (out of 55419)
120HS1	63564552	27066400	6893971	0.42581	0.254706	43881
120HS2	73020181	27837406	5800895	0.381229	0.208385	43895
120HS3	66285332	29587816	6160038	0.44637	0.208195	43667
120HS4	77307849	32441150	7211210	0.419636	0.222286	44031
120HS5	71567184	29468222	7244513	0.411756	0.245842	43938
120HS6	74363543	30759702	8494674	0.41364	0.276162	44233
120HS7	72631304	30404369	8660845	0.418612	0.284855	44274
12HS1	13928439	5946402	90275	0.426925	0.0151814	-
12HS2	43419783	23588005	8175086	0.543255	0.346578	42177
12HS3	46995647	26089083	8789804	0.555138	0.336915	42580
12HS4	50409454	28946779	11501958	0.574233	0.397348	43073
12HS5	51240137	29500945	11162692	0.575739	0.378384	42797
12HS6	39454833	22873838	8310378	0.579747	0.363314	42090
192HS1	74466969	33551881	9331792	0.450561	0.27813	44453
192HS2	76455043	32195882	10136451	0.421109	0.314837	44660
192HS3	76200285	34941022	10877808	0.458542	0.311319	44659
192HS4	74172425	35234579	10151494	0.475036	0.288112	44427
192HS5	76812439	33735229	10061036	0.43919	0.298235	44350
192HS6	71568980	32243353	8995113	0.450521	0.278976	44419
192HS7	69035208	28822124	10190652	0.417499	0.35357	44263
24HS1	51147052	28877425	12528463	0.564596	0.43385	43264
24HS2	49897621	28675324	13090665	0.574683	0.456513	43512
24HS3	52361308	29203571	9462749	0.557732	0.324027	42659
24HS4	51553621	29709756	11393030	0.576288	0.383478	43224
24HS5	55501377	32344093	13173274	0.582762	0.407285	43553
36HS1	37919236	17863929	4221446	0.471105	0.236311	40526
36HS2	34313567	17170509	5584362	0.5004	0.32523	41206
36HS3	39712897	20830902	5813832	0.524537	0.279097	41209
36HS4	38544501	20282409	7413305	0.526208	0.365504	41852
36HS5	12540401	2797623	889946	0.223089	0.318108	34014
36HS6	38900839	21446405	9642185	0.55131	0.449594	41840
72HS1	44400375	23684197	8510482	0.533423	0.359332	42666
72HS2	45804599	25548305	11033842	0.557767	0.431882	43162
72HS3	44303358	24570706	10356665	0.554601	0.421505	42801
72HS4	45230393	25412170	10518064	0.561838	0.413899	43131
72HS5	45535000	26068794	10572786	0.5725	0.405573	43204
72HS6	53347546	19245567	3094707	0.360758	0.160801	39127
96HS1	12794526	4516867	123718	0.353031	0.0273902	-
96HS2	31580317	18792369	8038274	0.595066	0.427741	42434
96HS3	18163325	9847200	3464972	0.542147	0.351874	39937
96HS4	29206681	16747284	5311700	0.573406	0.317168	41209
96HS5	26643949	15165076	3967783	0.569175	0.26164	40457
96HS6	18500098	9943960	2931307	0.537509	0.294783	39156
average	4.97861e+07	2.42786e+07	7.89252e+06	0.494151	0.314277	42585.6
		T-test vs G	0.144166
(T)Traumeel timecourse
Sample	Raw reads	Filtered reads	Informative reads*	%Filtered	%Informative	Expressed transcripts (out of 55419)
120HT1	74154128	35004289	12378334	0.472048	0.353623	44598
120HT2	88458590	41669782	13612296	0.471065	0.326671	44894
120HT3	58879421	29496183	8780910	0.500959	0.297696	43818
120HT4	40772577	18862912	3999355	0.462637	0.212022	41952
120HT5	49898272	22788338	5863226	0.456696	0.257291	42918
120HT6	53581065	24417059	6649394	0.455703	0.272326	43182
120HT7	65346050	30824931	8264866	0.471718	0.268123	43664
12HT1	25908712	9174571	1754155	0.354111	0.191197	37414
12HT2	44083537	25460033	9074620	0.577541	0.356426	42830
12HT3	52146351	30169581	12169745	0.578556	0.403378	43237
12HT4	48163813	24921041	5729102	0.517423	0.22989	40941
12HT5	54299506	31722391	13233956	0.584211	0.41718	43859
12HT6	49317982	27624480	9851331	0.56013	0.356616	42365
192HT1	63337559	28776805	7086737	0.45434	0.246266	43908
192HT2	62506362	28822117	8098926	0.461107	0.280997	43919
192HT3	80080393	38766615	11330586	0.484096	0.292277	44664
192HT4	39754383	18199074	6023697	0.457788	0.330989	42782
192HT5	43229407	21917458	7478655	0.507003	0.341219	43325
192HT6	43049359	19168189	6283955	0.445261	0.327832	42866
192HT7	32374048	17350681	5958391	0.535944	0.34341	42666
24HT1	41543864	24748367	8199688	0.595717	0.331322	42191
24HT2	49311974	25247479	8907843	0.511995	0.352821	42387
24HT3	35487663	17255004	6675242	0.486225	0.386858	42106
24HT4	57434631	31103348	10533638	0.541543	0.338666	42870
24HT5	55996923	30737974	10870427	0.548923	0.353648	43504
24HT6	47985391	26006765	11214746	0.541973	0.431224	43031
36HT1	37872223	19228538	6788400	0.507721	0.353038	41746
36HT2	35591515	18583723	8008808	0.522139	0.430958	41620
36HT3	35875684	17901283	6775271	0.498981	0.37848	41698
36HT4	32602443	15933223	5414141	0.488713	0.339802	41254
36HT5	37886925	19960764	7082239	0.526851	0.354808	41852
36HT6	34870746	17082688	5860800	0.489886	0.343084	40813
72HT1	39818312	22942106	9367596	0.57617	0.408315	42452
72HT2	32653050	13075492	3162848	0.400437	0.241891	40736
72HT3	37427684	17408792	3330993	0.465131	0.19134	40710
72HT4	29037440	12634216	3377046	0.435101	0.267294	40655
72HT5	29852681	12953409	3053205	0.433911	0.235707	39869
72HT6	23398505	8306199	1077168	0.354988	0.129682	36072
96HT1	48907313	25673163	6979671	0.524935	0.271866	42635
96HT2	30850039	17282367	4766064	0.560206	0.275776	41342
96HT3	33002650	18661273	6477622	0.565448	0.347116	42142
96HT4	53946574	28969997	10397171	0.537013	0.358894	43176
96HT5	29644118	16583316	5410339	0.559413	0.326252	41400
96HT6	18685347	9618725	3273084	0.514774	0.340283	39797
average	4.49778e+07	2.2569e+07	7.28696e+06	0.499921	0.315785	42178.6
		T-test vs Saline	0.381282
(U)Untreated timecourse
Sample	Raw reads	Filtered reads	Informative reads*	%Filtered	%Informative	Expressed transcripts (out of 55419)
0HU1	15181435	6988535	2158785	0.460334	0.308904	38292
0HU2	23088030	11448722	4048247	0.495873	0.353598	40213
0HU3	24930525	13111867	4584952	0.525936	0.34968	40657
0HU4	29893596	15354979	5070725	0.513654	0.330233	41333
0HU5	31455897	16226151	5426152	0.515838	0.334408	41444
0HU6	30242039	15057899	5692668	0.497913	0.378052	41445
0HU7	32438281	16922403	6046798	0.52168	0.357325	41971
12HU1	32123813	16148434	5926360	0.502694	0.366993	41978
12HU2	34233467	18358044	7002537	0.53626	0.381442	42533
12HU3	30136873	16819197	5912568	0.558094	0.351537	42366
12HU4	33633017	18303584	6909121	0.544215	0.377474	42657
12HU5	26189021	14840184	5210926	0.566657	0.351136	41916
12HU6	15070038	5336321	939704	0.354101	0.176096	36357
12HU7	36542796	14818476	4316956	0.40551	0.291323	41569
24HU1	34580665	14955925	4700900	0.432494	0.314317	41952
24HU2	40084331	17409741	5969007	0.434328	0.342854	42536
24HU3	38795014	17245501	5988367	0.444529	0.347242	42724
24HU4	35924767	16202577	5256364	0.451014	0.324415	42148
24HU5	42915600	19333428	6751886	0.450499	0.349234	42841
24HU6	38705991	16466716	5660194	0.425431	0.343735	42409
24HU7	32242988	14273763	5623159	0.442694	0.393951	42085
36HU1	29209608	12750043	5385833	0.436502	0.422417	41766
36HU2	39717980	18454605	8199624	0.464641	0.444313	43056
36HU3	43413464	19840203	8291887	0.457006	0.417934	42834
36HU4	51999024	24471991	9629380	0.470624	0.393486	43374
36HU5	55449668	26794698	11453577	0.483226	0.427457	44108
36HU6	55135577	25703913	9928288	0.466195	0.386256	43744
36HU7	58988151	26805132	9916214	0.454416	0.369937	43711
72HU1	57974687	25922071	9530455	0.447127	0.367658	43961
72HU2	58680346	26555357	10359532	0.452543	0.390111	44320
72HU3	50075233	20656354	7642257	0.412506	0.369971	43450
72HU4	53494618	23701699	8065903	0.443067	0.340309	43537
72HU5	59673431	25688350	8557500	0.430482	0.333128	44128
72HU6	42719109	20223739	5301429	0.473412	0.262139	43028
72HU7	16868299	8646660	2902812	0.512598	0.335715	40679
96HU1	22763639	11783715	4633530	0.517655	0.393215	41326
96HU2	24462477	12144335	5209592	0.496447	0.428973	42082
96HU3	25262115	13254513	5450554	0.524679	0.411223	42003
96HU4	28131554	15134362	5694848	0.537985	0.376286	42364
96HU5	31017107	16784131	7060388	0.541125	0.420659	42928
96HU6	32550362	17283520	7407220	0.530978	0.428571	42945
96HU7	32869522	17207502	7029014	0.523509	0.408485	42860
120HU1	26715241	15112756	5756310	0.565698	0.380891	42076
120HU2	37119777	20404108	9017016	0.549683	0.441922	43200
120HU3	36271828	20618783	8167961	0.568452	0.396142	43197
120HU4	39031306	22059386	9191534	0.565172	0.416672	43471
120HU5	31283702	18082904	7445987	0.57803	0.411769	42603
120HU6	33980063	19300267	8019212	0.567988	0.415497	42923
120HU7	41332124	23573836	10070555	0.570351	0.427192	43170
192HU1	41420579	23158993	9853247	0.559118	0.425461	43672
192HU2	35368602	19821157	8088146	0.560417	0.408056	43204
192HU3	27165494	15201404	6582859	0.559585	0.433043	42282
192HU4	32314510	18683041	7503374	0.578163	0.401614	42863
192HU5	40557378	22156096	9482331	0.54629	0.427978	43425
192HU6	42058798	23001142	10079144	0.546881	0.438202	43520
average	3.62452e+07	1.79382e+07	6.83825e+06	0.499496	0.375939	42422.5
		T-test vs saline	0.0644003
